# Supplementary material for: Trypanosoma cruzi reservoir—triatomine vector co-occurrence networks reveal meta-community effects by synanthropic mammals on geographic dispersal
Source: PeerJ. 2017 Apr 12;5:e3152. doi: 10.7717/peerj.3152 (PMC5391790; doi:10.7717/peerj.3152)
Supplement: Table S1 [file peerj-05-3152-s001.xlsx]

## Sheet: ids_species
id_specie	Specie_name	Class	T_cruzi_positive	Synanthropic
366	Alouatta palliata	Mammal	0	0
384	Alouatta pigra	Mammal	0	0
507	Ammospermophilus harrisii	Mammal	0	0
38	Ammospermophilus leucurus	Mammal	1	0
280	Anoura geoffroyi	Mammal	0	0
161	Antrozous pallidus	Mammal	0	0
168	Artibeus hirsutus	Mammal	0	0
6	Artibeus intermedius	Mammal	0	1
177	Artibeus jamaicensis	Mammal	1	1
287	Artibeus lituratus	Mammal	0	0
417	Ateles geoffroyi	Mammal	0	0
128	Baeodon alleni	Mammal	0	0
180	Baiomys musculus	Mammal	1	1
148	Baiomys taylori	Mammal	0	1
232	Balantiopteryx io	Mammal	0	0
270	Balantiopteryx plicata	Mammal	1	1
43	Bassariscus astutus	Mammal	1	1
9	Bassariscus sumichrasti	Mammal	0	0
461	Bauerus dubiaquercus	Mammal	0	0
397	Caluromys derbianus	Mammal	0	0
335	Canis latrans	Mammal	1	1
541	Canis lupus	Mammal	0	0
71	Carollia brevicauda	Mammal	0	0
347	Carollia castanea	Mammal	0	0
432	Carollia perspicillata	Mammal	1	1
48	Carollia sowelli	Mammal	1	1
200	Carollia subrufa	Mammal	0	0
20	Castor canadensis	Mammal	0	0
455	Centurio senex	Mammal	0	0
369	Chaetodipus arenarius	Mammal	0	0
252	Chaetodipus artus	Mammal	0	0
203	Chaetodipus baileyi	Mammal	0	0
33	Chaetodipus californicus	Mammal	0	0
563	Chaetodipus dalquesti	Mammal	0	0
157	Chaetodipus eremicus	Mammal	0	0
494	Chaetodipus fallax	Mammal	0	0
22	Chaetodipus formosus	Mammal	0	0
277	Chaetodipus goldmani	Mammal	0	0
459	Chaetodipus hispidus	Mammal	1	0
492	Chaetodipus intermedius	Mammal	0	0
447	Chaetodipus nelsoni	Mammal	0	0
419	Chaetodipus penicillatus	Mammal	0	0
74	Chaetodipus pernix	Mammal	0	0
57	Chaetodipus spinatus	Mammal	0	0
147	Chiroderma salvini	Mammal	0	0
360	Chiroderma villosum	Mammal	0	0
336	Chironectes minimus	Mammal	0	0
132	Choeroniscus godmani	Mammal	0	0
162	Choeronycteris mexicana	Mammal	1	1
281	Coendou mexicanus	Mammal	0	0
379	Conepatus leuconotus	Mammal	0	1
86	Conepatus mesoleucus	Mammal	0	1
82	Conepatus semistriatus	Mammal	0	0
195	Corynorhinus mexicanus	Mammal	0	0
454	Corynorhinus townsendii	Mammal	0	0
564	Cratogeomys castanops	Mammal	0	1
561	Cratogeomys fumosus	Mammal	0	1
565	Cratogeomys goldmani	Mammal	0	1
566	Cratogeomys gymnurus	Mammal	0	1
567	Cratogeomys merriami	Mammal	1	1
346	Cratogeomys tylorhinus	Mammal	0	1
471	Cryptotis goldmani	Mammal	0	0
408	Cryptotis magna	Mammal	0	0
182	Cryptotis mexicana	Mammal	0	0
247	Cryptotis parva	Mammal	0	0
122	Cryptotis phillipsii	Mammal	0	0
13	Cuniculus paca	Mammal	0	0
337	Cuniculus paca	Mammal	0	0
30	Cyclopes didactylus	Mammal	0	0
341	Dasyprocta mexicana	Mammal	0	0
301	Dasyprocta punctata	Mammal	1	0
358	Dasypus novemcinctus	Mammal	1	1
272	Dermanura azteca	Mammal	0	1
261	Dermanura phaeotis	Mammal	1	1
93	Dermanura tolteca	Mammal	0	0
192	Dermanura watsoni	Mammal	0	0
465	Desmodus rotundus	Mammal	1	1
103	Diclidurus albus	Mammal	0	0
101	Diclidurus virgo	Mammal	0	0
442	Didelphis marsupialis	Mammal	1	1
190	Didelphis virginiana	Mammal	1	1
547	Diphylla ecaudata	Mammal	0	0
248	Dipodomys agilis	Mammal	0	0
300	Dipodomys deserti	Mammal	0	0
359	Dipodomys gravipes	Mammal	0	0
99	Dipodomys merriami	Mammal	0	0
476	Dipodomys nelsoni	Mammal	0	0
42	Dipodomys ordii	Mammal	0	0
186	Dipodomys peninsularis	Mammal	0	0
477	Dipodomys phillipsii	Mammal	0	0
102	Dipodomys simulans	Mammal	0	0
548	Dipodomys spectabilis	Mammal	0	0
466	Eira barbara	Mammal	0	0
361	Enchistenes hartii	Mammal	0	0
39	Enchisthenes hartii	Mammal	0	0
314	Eptesicus brasiliensis	Mammal	0	0
179	Eptesicus furinalis	Mammal	0	0
531	Eptesicus fuscus	Mammal	0	0
504	Erethizon dorsatum	Mammal	0	0
462	Eumops bonariensis	Mammal	0	0
464	Eumops glaucinus	Mammal	0	0
486	Eumops underwoodi	Mammal	0	0
371	Galictis vittata	Mammal	1	1
244	Glaucomys volans	Mammal	0	0
519	Glossophaga commissarisi	Mammal	0	0
412	Glossophaga leachii	Mammal	0	0
467	Glossophaga morenoi	Mammal	0	0
368	Glossophaga soricina	Mammal	1	1
89	Habromys lepturus	Mammal	0	0
505	Habromys lophurus	Mammal	0	0
395	Habromys simulatus	Mammal	0	0
240	Herpailurus yagouaroundi	Mammal	0	0
413	Heteromys desmarestianus	Mammal	1	1
254	Heteromys gaumeri	Mammal	0	0
508	Hodomys alleni	Mammal	0	0
553	Hylonycteris underwoodi	Mammal	0	0
199	Idionycteris phyllotis	Mammal	0	0
96	Lampronycteris brachyotis	Mammal	0	0
525	Lasiurus blossevil	Mammal	0	0
75	Lasiurus blossevillii	Mammal	0	0
518	Lasiurus borealis	Mammal	0	0
10	Lasiurus cinereus	Mammal	0	0
415	Lasiurus ega	Mammal	0	0
250	Lasiurus intermedius	Mammal	0	0
409	Lasiurus xanthinus	Mammal	0	0
233	Leopardus pardalis	Mammal	0	0
51	Leopardus wiedii	Mammal	0	0
353	Leptonycteris curasoae	Mammal	0	1
79	Leptonycteris nivalis	Mammal	0	1
367	Lepus alleni	Mammal	0	0
434	Lepus californicus	Mammal	0	0
4	Lepus callotis	Mammal	0	0
536	Liomys irroratus	Mammal	1	1
142	Liomys pictus	Mammal	1	1
29	Liomys salvini	Mammal	0	1
135	Lonchorhina aurita	Mammal	0	0
279	Lontra longicaudis	Mammal	0	0
234	Lynx rufus	Mammal	1	0
60	Macrotus californicus	Mammal	0	0
170	Macrotus mexicanus	Mammal	0	0
292	Macrotus waterhousii	Mammal	0	0
325	Marmosa mexicana	Mammal	0	0
241	Mazama americana	Mammal	0	0
23	Mazama pandora	Mammal	0	0
435	Megadontomys cryophilus	Mammal	0	0
167	Megadontomys thomasi	Mammal	0	0
551	Megasorex gigas	Mammal	0	0
537	Mephitis macroura	Mammal	0	0
426	Mephitis mephitis	Mammal	1	1
316	Micronycteris megalotis	Mammal	0	0
1	Micronycteris mexicana	Mammal	0	0
226	Micronycteris microtis	Mammal	0	0
387	Micronycteris sylvestris	Mammal	0	0
62	Microtus californicus	Mammal	0	0
473	Microtus mexicanus	Mammal	0	0
198	Microtus quasiater	Mammal	0	0
2	Microtus waterhousii	Mammal	0	0
403	Mimon bennettii	Mammal	0	0
517	Mimon cozumelae	Mammal	0	0
143	Molossops greenhalli	Mammal	0	0
441	Molossus ater	Mammal	0	0
472	Molossus molossus	Mammal	0	0
394	Molossus nigricans	Mammal	0	0
32	Molossus pretiosus	Mammal	0	0
282	Molossus rufus	Mammal	0	0
529	Molossus sinaloae	Mammal	0	0
253	Mormoops megalophylla	Mammal	1	1
127	Mus musculus	Mammal	1	1
35	Musonycteris harrisoni	Mammal	0	0
206	Mustela frenata	Mammal	0	0
154	Myotis albescens	Mammal	0	0
263	Myotis auriculus	Mammal	0	0
303	Myotis californicus	Mammal	0	0
317	Myotis carteri	Mammal	0	0
126	Myotis ciliolabrum	Mammal	0	0
140	Myotis elegans	Mammal	0	0
393	Myotis fortidens	Mammal	0	0
260	Myotis keaysi	Mammal	0	0
377	Myotis leibii	Mammal	0	0
109	Myotis nigricans	Mammal	0	0
11	Myotis occultus	Mammal	0	0
309	Myotis peninsularis	Mammal	0	0
344	Myotis thysanodes	Mammal	0	0
152	Myotis velifera	Mammal	0	0
320	Myotis vivesi	Mammal	0	0
215	Myotis volans	Mammal	0	0
58	Myotis yumanensis	Mammal	0	0
385	Nannippus aztecus	Mammal	0	0
479	Nannippus peninsulatus	Mammal	0	0
558	Nasua narica	Mammal	1	1
469	Nasua nasua	Mammal	0	1
191	Natalus mexicanus	Mammal	0	0
169	Natalus stramineus	Mammal	0	0
26	Neotamias dorsalis	Mammal	0	0
356	Neotoma albigula	Mammal	1	1
554	Neotoma alleni	Mammal	0	0
49	Neotoma angustapalata	Mammal	0	0
349	Neotoma anthonyi	Mammal	0	0
107	Neotoma bryanti	Mammal	0	0
538	Neotoma fuscipes	Mammal	1	1
205	Neotoma goldmani	Mammal	0	1
112	Neotoma lepida	Mammal	1	1
329	Neotoma mexicana	Mammal	1	1
130	Neotoma micropus	Mammal	1	1
332	Neotoma nelsoni	Mammal	0	0
404	Neotoma palatina	Mammal	0	1
146	Neotoma phenax	Mammal	1	1
509	Neotomodon alstoni	Mammal	0	0
364	Noctilio leporinus	Mammal	0	0
418	Notiosorex crawfordi	Mammal	0	0
463	Notiosorex evotis	Mammal	0	0
428	Notolagus velox	Mammal	0	0
153	Nyctinomops aurispinosus	Mammal	0	0
380	Nyctinomops femorosaccus	Mammal	0	0
66	Nyctinomops laticaudatus	Mammal	0	0
534	Nyctinomops macrotis	Mammal	0	0
446	Nyctomys sumichrasti	Mammal	0	0
194	Odocoileus hemionus	Mammal	0	0
493	Odocoileus virginianus	Mammal	0	0
64	Oligoryzomys fulvescens	Mammal	0	1
427	Ondatra zibethicus	Mammal	0	0
326	Onychomys arenicola	Mammal	0	0
257	Onychomys leucogaster	Mammal	1	1
545	Onychomys torridus	Mammal	0	0
220	Orthogeomys grandis	Mammal	0	1
12	Orthogeomys hispidus	Mammal	0	1
201	Orthogeomys lanius	Mammal	0	0
345	Oryzomys albiventer	Mammal	0	0
121	Oryzomys alfaroi	Mammal	0	1
406	Oryzomys chapmani	Mammal	0	0
290	Oryzomys couesi	Mammal	1	1
407	Oryzomys melanotis	Mammal	0	1
342	Oryzomys palustris	Mammal	0	1
137	Oryzomys rostratus	Mammal	0	0
155	Osgoodomys banderanus	Mammal	0	0
55	Otonyctomys hatti	Mammal	0	0
87	Otospermophilus variegatus	Mammal	0	0
197	Ototylomys phyllotis	Mammal	1	1
15	Ovis canadensis	Mammal	0	0
283	Panthera onca	Mammal	0	0
555	Pappogeomys bulleri	Mammal	0	1
231	Pecari tajacu	Mammal	0	0
391	Perognathus amplus	Mammal	0	0
229	Perognathus flavescens	Mammal	0	1
526	Perognathus flavus	Mammal	0	1
499	Perognathus longimembris	Mammal	0	0
209	Perognathus merriami	Mammal	0	0
224	Perognathus pernix	Mammal	0	1
236	Peromyscus aztecus	Mammal	0	1
543	Peromyscus banderanus	Mammal	0	1
212	Peromyscus beatae	Mammal	0	0
315	Peromyscus boylii	Mammal	1	1
222	Peromyscus bullatus	Mammal	0	1
21	Peromyscus californicus	Mammal	1	1
489	Peromyscus crinitus	Mammal	0	1
14	Peromyscus difficilis	Mammal	0	1
498	Peromyscus eremicus	Mammal	1	1
213	Peromyscus eva	Mammal	0	1
150	Peromyscus furvus	Mammal	0	1
120	Peromyscus gratus	Mammal	0	0
480	Peromyscus guatemalensis	Mammal	0	1
88	Peromyscus gymnotis	Mammal	0	1
134	Peromyscus leucopus	Mammal	1	1
183	Peromyscus levipes	Mammal	1	1
238	Peromyscus maniculatus	Mammal	1	1
521	Peromyscus megalops	Mammal	0	1
293	Peromyscus melanophrys	Mammal	1	1
217	Peromyscus melanotis	Mammal	0	1
52	Peromyscus melanurus	Mammal	0	1
163	Peromyscus merriami	Mammal	0	1
95	Peromyscus mexicanus	Mammal	1	1
225	Peromyscus ochraventer	Mammal	0	1
443	Peromyscus pectoralis	Mammal	0	1
84	Peromyscus perfulvus	Mammal	0	1
327	Peromyscus polius	Mammal	0	1
310	Peromyscus simulus	Mammal	0	1
557	Peromyscus spicilegus	Mammal	0	1
396	Peromyscus truei	Mammal	1	1
500	Peromyscus yucatanicus	Mammal	1	1
450	Peromyscus zarhynchus	Mammal	0	1
223	Peropteryx kappleri	Mammal	0	0
85	Philander opossum	Mammal	1	1
348	Phyllostomus discolor	Mammal	0	0
386	Pipistrellus hesperus	Mammal	0	0
47	Pipistrellus subflavus	Mammal	0	0
357	Platyrrhinus helleri	Mammal	0	0
53	Plecotus rafinesquii	Mammal	0	0
535	Plecotus townsendii	Mammal	0	0
457	Plionictis oaxacaensis	Mammal	0	0
256	Potos flavus	Mammal	0	0
114	Procyon lotor	Mammal	1	1
125	Promops centralis	Mammal	0	0
354	Pteronotus davyi	Mammal	1	1
350	Pteronotus parnelli	Mammal	1	1
80	Pteronotus personatus	Mammal	0	0
265	Pteropteryx macrotis	Mammal	0	0
45	Puma concolor	Mammal	0	0
243	Rattus rattus	Mammal	1	1
108	Reithrodontomys chrysopsis	Mammal	0	1
158	Reithrodontomys fulvescens	Mammal	1	1
77	Reithrodontomys gracilis	Mammal	0	1
187	Reithrodontomys hirsutus	Mammal	0	0
352	Reithrodontomys megalotis	Mammal	0	1
298	Reithrodontomys mexicanus	Mammal	0	1
156	Reithrodontomys microdon	Mammal	0	1
522	Reithrodontomys sumichrasti	Mammal	0	1
131	Rheomys mexicanus	Mammal	0	0
355	Rhogeessa aeneus	Mammal	0	0
323	Rhogeessa alleni	Mammal	0	0
502	Rhogeessa gracilis	Mammal	0	0
221	Rhogeessa parvula	Mammal	0	0
311	Rhogeessa tumida	Mammal	0	0
106	Rhynchonycteris naso	Mammal	0	0
313	Romerolagus diazi	Mammal	0	0
474	Saccopteryx bilineata	Mammal	0	0
422	Sciurus alleni	Mammal	0	0
402	Sciurus aureogaster	Mammal	0	1
278	Sciurus colliaei	Mammal	0	0
97	Sciurus deppei	Mammal	0	1
363	Sciurus nayaritensis	Mammal	0	0
151	Sciurus niger	Mammal	0	0
487	Sciurus oculatus	Mammal	0	1
513	Sciurus variegatoides	Mammal	0	1
166	Sciurus yucatanensis	Mammal	0	1
285	Sigmodon alleni	Mammal	0	1
286	Sigmodon arizonae	Mammal	0	1
28	Sigmodon fulviventer	Mammal	0	1
296	Sigmodon hispidus	Mammal	1	1
173	Sigmodon leucotis	Mammal	0	1
546	Sigmodon mascotensis	Mammal	1	1
211	Sorex emarginatus	Mammal	0	0
533	Sorex macrodon	Mammal	0	0
514	Sorex ornatus	Mammal	0	0
523	Sorex saussurei	Mammal	0	0
72	Sorex ventralis	Mammal	0	0
90	Sorex veraepacis	Mammal	0	0
91	Spermophilus adocetus	Mammal	0	1
138	Spermophilus annulatus	Mammal	0	1
556	Spermophilus atricapillus	Mammal	0	0
165	Spermophilus beecheyi	Mammal	1	1
370	Spermophilus mexicanus	Mammal	0	1
530	Spermophilus perotensis	Mammal	0	1
262	Spermophilus spilosoma	Mammal	0	1
318	Spermophilus tereticaudus	Mammal	0	1
515	Spermophilus variegatus	Mammal	1	1
202	Sphiggurus mexicanus	Mammal	0	0
527	Spilogale angustifrons	Mammal	0	0
249	Spilogale putorius	Mammal	0	0
288	Spilogale pygmaea	Mammal	0	0
383	Sturnira lilium	Mammal	1	1
425	Sturnira ludovici	Mammal	0	0
460	Sylvilagus audubonii	Mammal	0	0
105	Sylvilagus bachmani	Mammal	0	0
214	Sylvilagus brasiliensis	Mammal	0	0
174	Sylvilagus cunicularius	Mammal	0	0
478	Sylvilagus floridanus	Mammal	0	0
399	Tadarida brasiliensis	Mammal	1	1
528	Tadarida laticaudata	Mammal	0	0
3	Tamandua mexicana	Mammal	0	0
245	Tamandua tetradactyla	Mammal	0	0
338	Tamias bulleri	Mammal	0	1
27	Tapirus bairdii	Mammal	0	0
376	Taxidea taxus	Mammal	0	0
228	Tayassu tajacu	Mammal	0	0
117	Thomomys bottae	Mammal	0	1
299	Thomomys umbrinus	Mammal	0	1
429	Thyroptera tricolor	Mammal	1	0
207	Tlacuatzin canescens	Mammal	0	0
17	Tonatia evotis	Mammal	0	0
196	Trachops cirrhosus	Mammal	0	0
175	Tylomys nudicaudatus	Mammal	0	0
321	Urocyon cinereoargenteus	Mammal	1	1
237	Uroderma bilobatum	Mammal	1	0
145	Uroderma magnirostrum	Mammal	0	0
204	Vampyressa pusilla	Mammal	0	0
322	Vampyressa thyone	Mammal	0	0
76	Vampyrodes caraccioli	Mammal	0	1
176	Vampyrum spectrum	Mammal	1	0
482	Vulpes velox	Mammal	0	0
438	Xenomys nelsoni	Mammal	0	0
193	Dipetalogaster maxima	triatominae	1	1
171	Paratriatoma hirsuta	triatominae	1	0
319	Triatoma barberi	triatominae	1	1
172	Triatoma brailovskyi	triatominae	1	0
365	Triatoma dimidiata golfo	triatominae	1	1
7	Triatoma dimidiata pacifico	triatominae	1	1
239	Triatoma dimidiata yucatan	triatominae	1	1
235	Triatoma gerstaeckeri	triatominae	1	1
308	Triatoma lecticularia	triatominae	1	0
491	Triatoma longipennis	triatominae	1	1
227	Triatoma mazzottii	triatominae	1	1
485	Triatoma mexicana	triatominae	1	1
275	Triatoma nahuatlae	triatominae	1	0
374	Triatoma neotomae	triatominae	1	0
289	Triatoma pallidipennis	triatominae	1	1
24	Triatoma peninsularis	triatominae	1	0
68	Triatoma phyllosoma	triatominae	1	1
258	Triatoma picturata	triatominae	1	1
475	Triatoma protracta	triatominae	1	1
449	Triatoma recurva	triatominae	1	1
40	Triatoma rubida	triatominae	1	1
67	Triatoma sinaloensis	triatominae	1	0
516	Triatoma sonoriana	triatominae	1	1
381	Triatoma uhleri	triatominae	1	1
524	Triatoma woodi	triatominae	1	0
284	Triatoma zacatecensis	triatominae	1	0
